# Supplementary material
Source: publisher figshare collection journal article supplement (https://acs.figshare.com/ndownloader/files/26414776)
Supplement: Supplementary file 1 [file 26414776]

# Supporting Information:

## How Hydrogen Bonding Amplifies Isomeric Differences in Pyridones Towards Strong Changes in Acidity and Tautomerism

Robby Büchner,<sup>\*,†</sup> Mattis Fondell,<sup>‡</sup> Eric J. Mascarenhas,<sup>‡,†</sup> Annette Pietzsch,<sup>‡</sup>

Vinícius Vaz da Cruz,<sup>\*,‡</sup> and Alexander Föhlisch<sup>‡,†</sup>

<sup>†</sup>*Institute of Physics and Astronomy, University of Potsdam, Karl-Liebknecht-Str. 24-25,  
14476 Potsdam, Germany*

<sup>‡</sup>*Institute for Methods and Instrumentation for Synchrotron Radiation Research,  
Helmholtz-Zentrum Berlin für Materialien und Energie, Albert-Einstein-Str. 15, 12489  
Berlin, Germany*

E-mail: robby.buechner@helmholtz-berlin.de; vinicius.vaz\_da\_cruz@helmholtz-berlin.de

# Resonance structures of the Pyridone isomers

The resonance structures of the *ortho*, *meta*, and *para* Pyridone isomers are shown in Fig. S1.

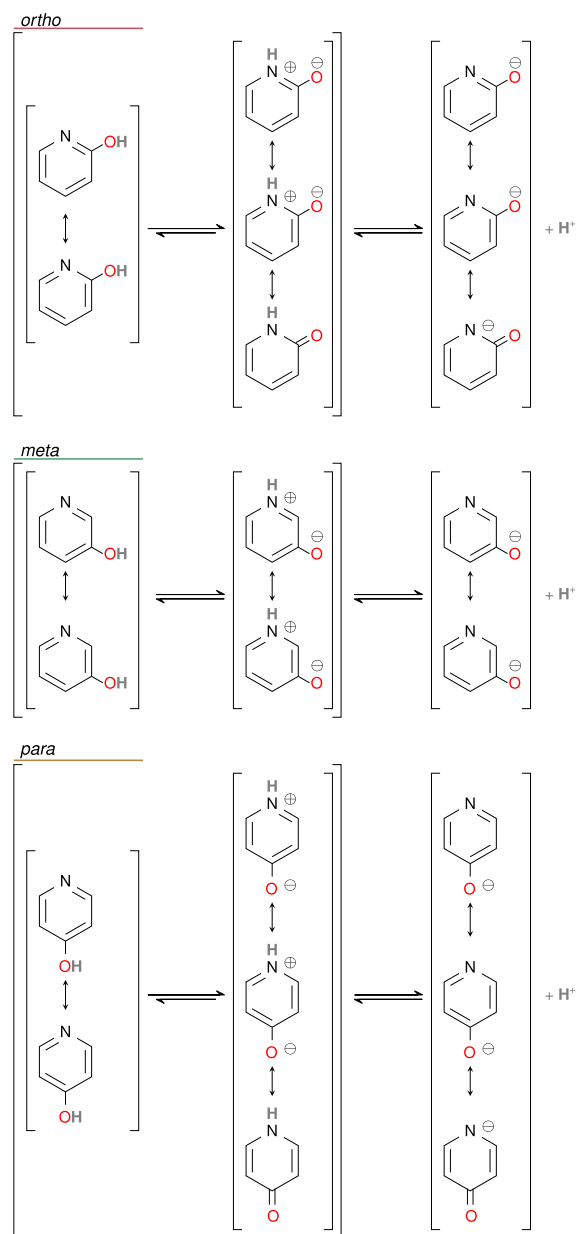

Figure S1: Resonance structures of the Hydroxypyridine (left) and Pyridone (middle) tautomers along with the fully deprotonated species (right).

# Details of the Molecular Dynamics Simulations

The following procedure was carried out for all nine chemical species under study: Initially, a cubic box of 3.4 nm length comprising the chemical species of interest has been generated, then one  $\text{Cl}^-$  and  $\text{K}^+$  counterion was added to the box for positively charged ( $\text{PyH}^+$ ) and negatively charged molecules ( $2\text{PO}^-$ ,  $3\text{PO}^-$ ,  $4\text{PO}^-$ ), respectively. The remaining space was filled with solvent molecules by using the *gmx\_solvate* tool from the Gromacs package.<sup>S1</sup> All calculations used periodic boundary conditions. The temperature was controlled by a modified Berendsen thermostat (0.1 ps time constant) and in NPT runs the Parrinello-Rahman pressure-coupling (2 ps time constant) was used. For the calculation of the Coulomb and van der Waals term a cut-off of 1.4 nm was employed, while long-range electrostatics were treated via the particle mesh Ewald (PME) procedure. The energy of the initially generated system was minimized and subsequently the box was equilibrated in two steps: Firstly, an NVT equilibration at  $T = 298$  K was run for 500 ps ( $\Delta t = 0.5$  fs), followed by an NPT equilibration at  $T = 298$  K and  $P = 1$  bar, which was also run for 500 ps ( $\Delta t = 0.5$  fs). The coordinates of the complex were constrained to the center of the box throughout the equilibration. Finally, a production NPT run of 10 ns ( $\Delta t = 0.5$  fs,  $T = 298$  K and  $P = 1$  bar) was performed from which snapshots were collected every 1 ps. The final run was used for analysis of the radial distribution functions (see Fig. S2), hydrogen bonding properties (see below) and solvent mass-density plots (in the main article).

## Force field and chelpg charges

The parameters for the intramolecular degrees of freedom as well as the Lennard-Jones non-bonded interactions were taken from the OPLS-aa<sup>S2</sup> force field by choosing the closest match to the molecules at hand. Since the charges used for the Coulomb interactions are not transferable as the other parameters, we chose to derive them for each molecule using the chelpg<sup>S3</sup> procedure, as implemented in the *orca\_chelpg* utility program. The charges were

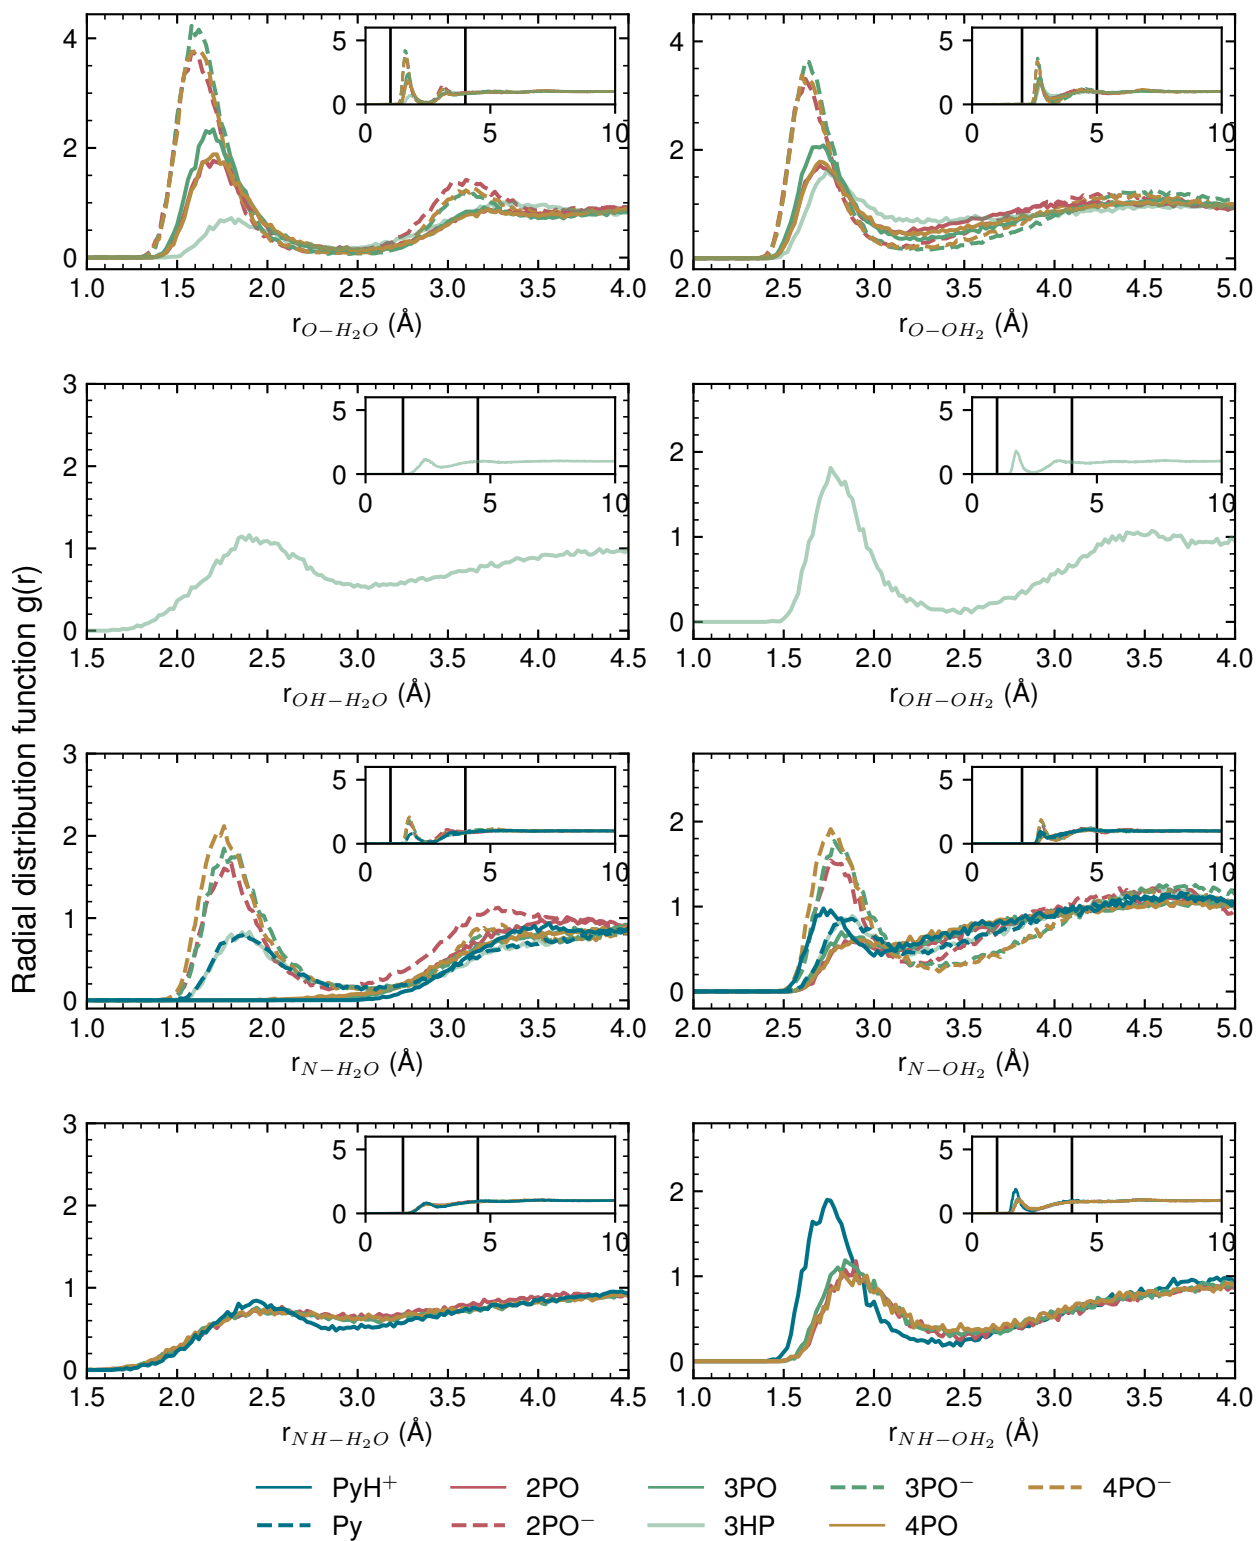

Figure S2: Radial distribution functions between oxygen (1<sup>st</sup> row), hydrogen (2<sup>nd</sup>, 4<sup>th</sup> row), or nitrogen (3<sup>rd</sup> row) of the sample and hydrogen (left) or oxygen (right) of water.

derived based on structures optimized at the RI-MP2 level of theory with the aug-cc-pVTZ basis set and the aug-cc-pVTZ/C auxiliary basis set. The calculations used CPCM.<sup>S4</sup> The full set of charges obtained is shown in Tab. S1.

**Table S1: Chelpg charges used for the description of the electrostatic interactions in the MD simulations. For all molecules the nitrogen atom is labeled N1, then all carbon atoms are numbered clockwise. The numbering of the oxygen and hydrogen atoms is taken as the same number of the respective atom to which they are bonded.**

| PyH <sup>+</sup> |        | Py               |        | 2PO   |        | 2PO <sup>-</sup> |        |                  |        |
|------------------|--------|------------------|--------|-------|--------|------------------|--------|------------------|--------|
| label            | q (e)  | label            | q (e)  | label | q (e)  | label            | q (e)  |                  |        |
| N1               | -0.089 | N1               | -0.665 | N1    | -0.310 | N1               | -0.891 |                  |        |
| H1               | 0.341  | C2               | 0.482  | H1    | 0.303  | C2               | 1.173  |                  |        |
| C2               | -0.008 | C3               | -0.530 | C2    | 0.646  | C3               | -0.750 |                  |        |
| C3               | -0.058 | C4               | 0.272  | C3    | -0.333 | C4               | 0.265  |                  |        |
| C4               | -0.016 | C5               | -0.530 | C4    | 0.009  | C5               | -0.744 |                  |        |
| C5               | -0.059 | C6               | 0.482  | C5    | -0.276 | C6               | 0.466  |                  |        |
| C6               | -0.008 | H2               | 0.020  | C6    | -0.046 | H3               | 0.168  |                  |        |
| H2               | 0.184  | H3               | 0.191  | H3    | 0.171  | H4               | 0.029  |                  |        |
| H3               | 0.179  | H4               | 0.067  | H4    | 0.123  | H5               | 0.171  |                  |        |
| H4               | 0.170  | H5               | 0.191  | H5    | 0.164  | H6               | -0.016 |                  |        |
| H5               | 0.180  | H6               | 0.020  | H6    | 0.155  | O2               | -0.871 |                  |        |
| H6               | 0.184  |                  |        | O2    | -0.606 |                  |        |                  |        |
| 3PO              |        | 3PO <sup>-</sup> |        | 3HP   |        | 4PO              |        | 4PO <sup>-</sup> |        |
| label            | q (e)  | label            | q (e)  | label | q (e)  | label            | q (e)  | label            | q (e)  |
| N1               | -0.059 | N1               | -0.729 | N1    | -0.636 | N1               | -0.257 | N1               | -0.847 |
| H1               | 0.304  | C2               | 0.283  | C2    | 0.343  | H1               | 0.311  | C2               | 0.494  |
| C2               | -0.259 | C3               | 0.252  | C3    | 0.071  | C2               | -0.019 | C3               | -0.837 |
| C3               | 0.606  | C4               | 0.009  | C4    | -0.005 | C3               | -0.378 | C4               | 1.050  |
| C4               | -0.292 | C5               | -0.573 | C5    | -0.441 | C4               | 0.701  | C5               | -0.837 |
| C5               | -0.063 | C6               | 0.312  | C6    | 0.377  | C5               | -0.367 | C6               | 0.492  |
| C6               | -0.229 | H2               | -0.005 | H2    | 0.077  | C6               | -0.027 | H2               | -0.020 |
| H2               | 0.163  | H4               | 0.060  | H4    | 0.115  | H2               | 0.145  | H3               | 0.187  |
| H4               | 0.160  | H5               | 0.158  | H5    | 0.189  | H3               | 0.177  | H5               | 0.187  |
| H5               | 0.142  | H6               | -0.007 | H6    | 0.044  | H5               | 0.173  | H6               | -0.019 |
| H6               | 0.165  | O3               | -0.760 | O3    | -0.548 | H6               | 0.148  | O4               | -0.850 |
| O3               | -0.638 |                  |        | H3    | 0.414  | O4               | -0.607 |                  |        |

## Hydrogen bonding properties

The analysis of the hydrogen bonding properties was carried out by examining the radial distribution functions, obtained with the *gmx\_rdf* tool, as well as analysing hydrogen bond (HB) statistics with the *gmx\_hbond* tool included in the Gromacs package. The full set of HB parameters is shown in Tab. S2

**Table S2: Hydrogen bonding parameters extracted from the MD simulations in aqueous solution. The  $r_{NH}$  distance is obtained from the maximum of the  $g_{XH}(r)$  and  $g_{HO}(r)$  pair-correlation functions. The number of HBs ( $n_{HB}$ ) is defined via the X=N,O and the water OH bond for  $\angle XHO < 20^\circ$  and  $r_{X-O} < 3.5 \text{ \AA}$ .**

| Molecule         | $r_{N-H}$  | $r_{N-O} \text{ (\AA)}$  | $\angle NOH \text{ (}^\circ\text{)}$ | $n_{HB}$        |
|------------------|------------|--------------------------|--------------------------------------|-----------------|
| Py               | 1.87       | $2.92 \pm 0.18$          | $11.16 \pm 4.91$                     | $0.90 \pm 0.60$ |
| 2PO <sup>-</sup> | 1.79       | $2.86 \pm 0.17$          | $10.01 \pm 4.78$                     | $1.58 \pm 0.58$ |
| 3PO <sup>-</sup> | 1.80       | $2.88 \pm 0.18$          | $10.16 \pm 4.83$                     | $1.92 \pm 0.63$ |
| 4PO <sup>-</sup> | 1.77       | $2.86 \pm 0.18$          | $9.71 \pm 4.74$                      | $2.09 \pm 0.61$ |
| 3HP              | 1.88       | $2.93 \pm 0.18$          | $11.22 \pm 4.88$                     | $0.87 \pm 0.61$ |
| Molecule         | $r_{NH-O}$ | $r_{N-O} \text{ (\AA)}$  | $\angle NHO \text{ (}^\circ\text{)}$ | $n_{HB}$        |
| PyH <sup>+</sup> | 1.76       | $2.78 \pm 0.13$          | $10.86 \pm 4.89$                     | $0.72 \pm 0.45$ |
| 2PO              | 1.90       | $2.95 \pm 0.19$          | $11.48 \pm 4.91$                     | $0.60 \pm 0.50$ |
| 3PO              | 1.88       | $2.91 \pm 0.19$          | $11.61 \pm 4.87$                     | $0.60 \pm 0.51$ |
| 4PO              | 1.90       | $2.95 \pm 0.20$          | $11.69 \pm 4.88$                     | $0.58 \pm 0.53$ |
| Molecule         | $r_{CO-H}$ | $r_{CO-O} \text{ (\AA)}$ | $\angle OOH \text{ (}^\circ\text{)}$ | $n_{HB}$        |
| 2PO              | 1.72       | $2.78 \pm 0.17$          | $10.50 \pm 4.84$                     | $1.59 \pm 0.66$ |
| 3PO              | 1.71       | $2.77 \pm 0.17$          | $10.24 \pm 4.82$                     | $1.96 \pm 0.68$ |
| 4PO              | 1.72       | $2.79 \pm 0.17$          | $10.57 \pm 4.91$                     | $1.66 \pm 0.69$ |
| 2PO <sup>-</sup> | 1.58       | $2.70 \pm 0.16$          | $9.00 \pm 4.59$                      | $2.76 \pm 0.54$ |
| 3PO <sup>-</sup> | 1.58       | $2.71 \pm 0.16$          | $8.92 \pm 4.55$                      | $3.11 \pm 0.56$ |
| 4PO <sup>-</sup> | 1.62       | $2.70 \pm 0.16$          | $9.00 \pm 4.60$                      | $2.87 \pm 0.55$ |
| 3HP              | 1.80       | $2.88 \pm 0.19$          | $11.35 \pm 4.89$                     | $0.72 \pm 0.58$ |
| Molecule         | $r_{OH-O}$ | $r_{CO-O} \text{ (\AA)}$ | $\angle OHO \text{ (}^\circ\text{)}$ | $n_{HB}$        |
| 3HP              | 1.80       | $2.83 \pm 0.18$          | $10.88 \pm 4.87$                     | $1.52 \pm 0.71$ |

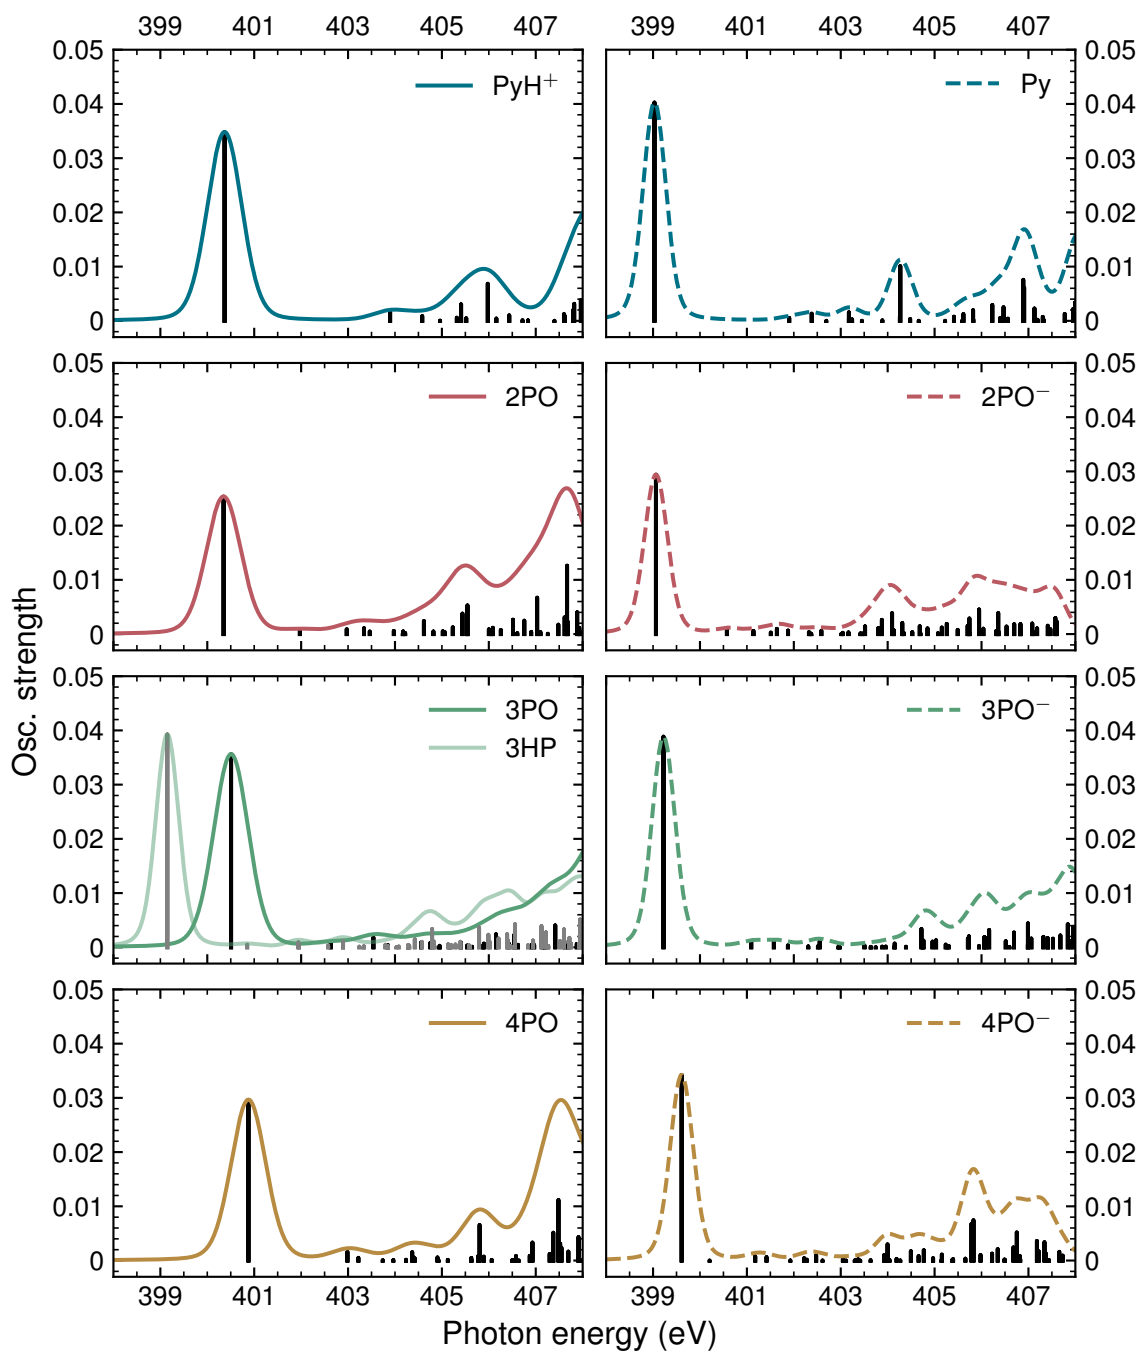

Figure S3: X-ray absorption at the N  $K$ -edge as calculated by the TD-DFT method. The energy axis is shifted by 11.135 eV to ease the comparison with the experimental spectra in the main article. Transition moments are shown as black bars. For the plotted spectra a lifetime broadening of 0.13 eV<sup>S5</sup> and an experimental broadening of 0.51 eV (deprotonated nitrogen) or 0.80 eV (protonated nitrogen) have been used.

## TD-DFT

As described in the computational details section of the main article, TD-DFT calculations were performed on the optimized geometries with the minimally-solvated models resulting from the MD simulation. The TD-DFT calculations were carried out with PBE0 hybrid functionals<sup>S6</sup> utilizing the def2-QZVPPD<sup>S7,S8</sup> basis and def2/J<sup>S9</sup> auxiliary basis set with the RIJCOSX<sup>S10</sup> approximation. CPCM<sup>S4</sup> was used to account for bulk-liquid effects. For numerical integration the ORCA<sup>S11</sup> Grid7 (and GridX9 as COSX grid) were used.

N *K*-edge absorption spectra (see Fig. S3) were obtained by applying a Voigt function to every transition moment. The Gaussian broadening results from a global fit of the experimental  $\pi^*$  resonance of all molecules with the same nitrogen protonation state and a fixed Lorentzian FWHM of 0.13 eV.<sup>S5</sup> Additionally the spectra were shifted according to the difference of the TD-DFT and experimental  $\pi^*$  resonance of Py.

## References

- (S1) Lindahl,; Abraham,; Hess,; van der Spoel, GROMACS 2019 source code. <https://doi.org/10.5281/zenodo.2424363>.
- (S2) Jorgensen, W. L.; Maxwell, D. S.; Tirado-Rives, J. Development and testing of the OPLS all-atom force field on conformational energetics and properties of organic liquids. *J. Am. Chem. Soc.* **1996**, *118*, 11225–11236.
- (S3) Breneman, C. M.; Wiberg, K. B. Determining atom-centered monopoles from molecular electrostatic potentials. The need for high sampling density in formamide conformational analysis. *J. Comput. Chem.* **1990**, *11*, 361–373.
- (S4) Barone, V.; Cossi, M. Quantum calculation of molecular energies and energy gradients in solution by a conductor solvent model. *J. Phys. Chem. A* **1998**, *102*, 1995–2001.



- (S5) Nicolas, C.; Miron, C. Lifetime broadening of core-excited and -ionized states. *J. Electron Spectrosc. Relat. Phenom.* **2012**, *185*, 267 – 272.
- (S6) Adamo, C.; Barone, V. Toward reliable density functional methods without adjustable parameters: The PBE0 model. *J. Chem. Phys.* **1999**, *110*, 6158–6170.
- (S7) Weigend, F.; Ahlrichs, R. Balanced basis sets of split valence, triple zeta valence and quadruple zeta valence quality for H to Rn: Design and assessment of accuracy. *Phys. Chem. Chem. Phys.* **2005**, *7*, 3297–3305.
- (S8) Rappoport, D.; Furche, F. Property-optimized Gaussian basis sets for molecular response calculations. *J. Chem. Phys.* **2010**, *133*, 134105.
- (S9) Weigend, F. Accurate Coulomb-fitting basis sets for H to Rn. *Phys. Chem. Chem. Phys.* **2006**, *8*, 1057–1065.
- (S10) Neese, F.; Wennmohs, F.; Hansen, A.; Becker, U. Efficient, approximate and parallel Hartree-Fock and hybrid DFT calculations. A chain-of-spheres-algorithm for the Hartree-Fock exchange. *Chem. Phys.* **2009**, *356*, 98 – 109.
- (S11) Neese, F. The ORCA program system. *Wiley Interdiscip. Rev.: Comput. Mol. Sci.* **2012**, *2*, 73–78.
